# Supplementary material for: The Association Between Healthcare Resources, Non-communicable Diseases, and Covid-19 Mortality: An Epidemiological Study of 139 Countries
Source: Research Square preprint supplement (doi:10.21203/rs.3.rs-379944/v1), 2021-04-22
Supplement: Supplementary file 1 [file 154fd75c138b3f5c62cd4061.docx]

**Supplemental Table 4:** Burden of non-communicable diseases measured as disability-adjusted life expectancy (NCD DALYs), access to healthcare measured by health access quality index (HAQI), and healthy life expectancy (HALE).

| **Location** | **NCD DALYs†** | **HAQI[[1]](#endnote-1)** | **HALE****[[2]](#endnote-2)** |
| --- | --- | --- | --- |
| Afghanistan | 19859·58 | 25·9 | 54·11 |
| Albania | 23218·67 | 75·4 | 68·86 |
| Algeria | 17796·82 | 63·1 | 66·30 |
| Andorra | 22876·31 | 94·7 | 70·88 |
| Angola | 13857·91 | 33·4 | 56·75 |
| Argentina | 21498·29 | 68·1 | 66·79 |
| Armenia | 25818·48 | 70·7 | 66·64 |
| Australia | 21669·08 | 95·9 | 70·31 |
| Austria | 25020·42 | 93·9 | 70·60 |
| Azerbaijan | 23602·00 | 65·6 | 63·01 |
| Bahamas | 23151·34 | 66·4 | 64·24 |
| Bahrain | 16643·52 | 72 | 66·59 |
| Bangladesh | 17742·50 | 47·6 | 64·53 |
| Barbados | 27873·65 | 70·8 | 66·70 |
| Belarus | 32829·18 | 79 | 65·06 |
| Belgium | 25121·37 | 92·9 | 69·72 |
| Belize | 16476·57 | 55·7 | 65·06 |
| Benin | 15118·82 | 30·8 | 56·64 |
| Bhutan | 17622·51 | 47·3 | 63·23 |
| Bolivia | 18712·62 | 48·8 | 63·11 |
| Bosnia and Herzegovina | 30234·73 | 72·2 | 66·96 |
| Botswana | 18553·99 | 51·5 | 54·06 |
| Brazil | 21524·47 | 63·8 | 65·20 |
| Bulgaria | 41611·41 | 77·2 | 64·58 |
| Burkina Faso | 18520·84 | 30·1 | 54·16 |
| Burundi | 13888·84 | 27·4 | 55·50 |
| Cameroon | 14691·92 | 31·9 | 55·43 |
| Canada | 23641·34 | 93·8 | 70·45 |
| Central African Republic | 18872·64 | 18·6 | 45·71 |
| Chad | 14999·25 | 25·4 | 52·85 |
| Chile | 20387·15 | 77·9 | 69·23 |
| China | 22824·04 | 77·9 | 68·53 |
| Colombia | 17121·98 | 68·5 | 69·57 |
| Comoros | 16588·36 | 33 | 60·34 |
| Congo | 16151·86 | 29·6 | 57·02 |
| Costa Rica | 18198·61 | 73·7 | 69·38 |
| Côte d'Ivoire | 14225·33 | 27·3 | 56·19 |
| Croatia | 30079·72 | 86·9 | 68·21 |
| Cuba | 25527·82 | 75·5 | 68·43 |
| Cyprus | 21099·47 | 90·3 | 69·90 |
| Czech Republic | 27661·55 | 89 | 68·60 |
| Democratic Republic of Congo | 14245·30 | 34·1 | 56·34 |
| Denmark | 25991·38 | 92·1 | 69·92 |
| Djibouti | 15124·42 | 35 | 58·94 |
| Dominican Republic | 19713·94 | 61·2 | 64·22 |
| Ecuador | 17051·50 | 62·2 | 66·74 |
| Egypt | 20583·25 | 58 | 62·47 |
| El Salvador | 19102·87 | 63·2 | 65·53 |
| Equatorial Guinea | 11796·31 | 49·3 | 57·21 |
| Eritrea | 14867·41 | 27·6 | 55·86 |
| Estonia | 29969·24 | 85·9 | 68·13 |
| Ethiopia | 12188·95 | 28·1 | 60·22 |
| Finland | 26345·75 | 95·9 | 70·34 |
| France | 23163·02 | 91·7 | 71·50 |
| Gabon | 17319·11 | 40·4 | 58·82 |
| Gambia | 14688·70 | 35·7 | 58·32 |
| Georgia | 33346·31 | 67·1 | 64·52 |
| Germany | 28678·90 | 92 | 69·72 |
| Ghana | 15832·43 | 39·3 | 58·22 |
| Greece | 29204·94 | 90·4 | 69·91 |
| Guatemala | 16961·80 | 51·5 | 62·91 |
| Guinea | 17158·28 | 26·4 | 53·87 |
| Guinea-Bissau | 16817·98 | 23·4 | 53·61 |
| Guyana | 25997·38 | 49·8 | 58·37 |
| Haiti | 23173·42 | 32·1 | 55·43 |
| Honduras | 17593·72 | 46·5 | 63·02 |
| Hungary | 33564·51 | 82·1 | 66·79 |
| Iceland | 19481·24 | 97·1 | 72·32 |
| India | 19493·49 | 41·2 | 60·52 |
| Indonesia | 21588·51 | 44·5 | 62·55 |
| Iran | 18380·71 | 71·8 | 66·83 |
| Iraq | 16096·59 | 51·1 | 63·38 |
| Ireland | 21324·04 | 94·6 | 70·35 |
| Israel | 16865·04 | 84·8 | 71·82 |
| Italy | 27048·39 | 94·9 | 71·24 |
| Jamaica | 21165·67 | 62 | 66·51 |
| Japan | 24454·60 | 94·1 | 73·84 |
| Jordan | 13789·28 | 70·2 | 67·97 |
| Kazakhstan | 23774·17 | 69·1 | 63·16 |
| Kenya | 12969·22 | 39·5 | 58·25 |
| Kuwait | 13747·15 | 80·7 | 70·25 |
| Kyrgyzstan | 17938·03 | 60·6 | 64·93 |
| Latvia | 34033·92 | 80·7 | 66·32 |
| Lebanon | 21637·08 | 85·6 | 66·04 |
| Lesotho | 21707·64 | 32 | 45·24 |
| Liberia | 13712·65 | 32·2 | 56·89 |
| Libya | 18723·52 | 71·1 | 65·32 |
| Lithuania | 32716·57 | 80·5 | 66·56 |
| Luxembourg | 21278·48 | 96 | 70·99 |
| Macedonia | 30452·06 | 75·1 | 65·38 |
| Madagascar | 15156·40 | 29·6 | 57·60 |
| Malawi | 13644·43 | 32·2 | 56·58 |
| Malaysia | 18191·09 | 68·1 | 65·65 |
| Maldives | 13386·55 | 70·4 | 69·11 |
| Mali | 15895·60 | 34·9 | 54·26 |
| Malta | 24598·60 | 89·9 | 71·07 |
| Mauritania | 12762·69 | 40·6 | 62·17 |
| Mauritius | 27878·17 | 68·7 | 65·15 |
| Mexico | 20385·03 | 66·3 | 65·36 |
| Moldova | 30373·36 | 67·4 | 65·15 |
| Monaco | 32507·78 | 31·6 | 69·16 |
| Mongolia | 24660·85 | 53·4 | 60·44 |
| Montenegro | 29139·80 | 81 | 66·49 |
| Morocco | 21131·84 | 57·6 | 63·83 |
| Mozambique | 14855·50 | 30 | 50·80 |
| Myanmar | 23226·02 | 41·6 | 60·85 |
| Namibia | 15908·59 | 44·6 | 56·77 |
| Nepal | 18692·83 | 40 | 61·51 |
| Netherlands | 24733·74 | 96·1 | 70·62 |
| New Zealand | 22577·18 | 92·4 | 69·59 |
| Niger | 14105·83 | 28·4 | 55·06 |
| Nigeria | 14453·74 | 41·9 | 56·04 |
| Norway | 22101·50 | 96·6 | 70·84 |
| Oman | 12719·49 | 76·2 | 64·76 |
| Pakistan | 18385·98 | 37·6 | 57·20 |
| Panama | 16549·49 | 68·3 | 69·24 |
| Paraguay | 17518·56 | 56·7 | 66·45 |
| Peru | 14987·21 | 64·3 | 69·90 |
| Philippines | 18816·86 | 51·2 | 62·73 |
| Poland | 27818·22 | 82·4 | 68·12 |
| Portugal | 27468·55 | 85·7 | 70·21 |
| Qatar | 11583·12 | 81·7 | 66·27 |
| Romania | 33091·02 | 78·3 | 66·36 |
| Russia | 32285·39 | 75·1 | 63·74 |
| Rwanda | 14363·19 | 36 | 59·83 |
| San Marino | 24239·15 | 94·7 | 70·88 |
| Sao Tome and Principe | 16231·72 | 39·3 | 62·28 |
| Saudi Arabia | 15712·65 | 77·1 | 64·48 |
| Senegal | 14663·09 | 31·1 | 59·86 |
| Serbia | 33039·14 | 77·2 | 66·33 |
| Sierra Leone | 16896·85 | 31 | 54·06 |
| Singapore | 15384·33 | 90·6 | 74·48 |
| Slovakia | 27224·42 | 83·3 | 67·61 |
| Slovenia | 25115·67 | 90·8 | 70·38 |
| South Africa | 18374·80 | 49·7 | 56·18 |
| South Korea | 18916·59 | 90·3 | 72·33 |
| South Sudan | 14058·35 | 26·8 | 54·60 |
| Spain | 24409·61 | 91·9 | 71·60 |
| Sri Lanka | 20192·17 | 70·6 | 66·95 |
| Sudan | 17121·56 | 45·8 | 61·42 |
| Suriname | 23762·66 | 54·5 | 62·93 |
| Swaziland | 18198·56 | 40·5 | 50·61 |
| Sweden | 23508·10 | 95·5 | 71·39 |
| Switzerland | 22082·39 | 95·6 | 72·02 |
| Syria | 20181·23 | 67·2 | 63·89 |
| Tajikistan | 18121·82 | 51·7 | 61·84 |
| Togo | 15026·34 | 32 | 57·01 |
| Trinidad and Tobago | 26314·93 | 64·3 | 65·18 |
| Tunisia | 20227·90 | 69·4 | 67·44 |
| Turkey | 20160·20 | 74·4 | 67·81 |
| Uganda | 12861·21 | 31·4 | 57·75 |
| Ukraine | 39984·31 | 74·6 | 64·62 |
| United Arab Emirates | 17720·95 | 70·3 | 64·38 |
| United Kingdom | 25870·97 | 90·5 | 69·11 |
| United States | 29263·03 | 88·7 | 65·43 |
| Uruguay | 24942·47 | 71 | 67·45 |
| Uzbekistan | 20963·03 | 62·9 | 60·88 |
| Venezuela | 20553·77 | 67·8 | 65·44 |
| Vietnam | 20160·76 | 60·3 | 65·74 |
| Yemen | 16756·78 | 43·3 | 58·59 |
| Zambia | 14528·64 | 29 | 55·08 |
| Zimbabwe | 15748·82 | 31·2 | 53·56 |

1. Database: Global Burden of Disease Study 2016  [↑](#endnote-ref-1)
2. Database: Global Burden of Disease Study 2019 [↑](#endnote-ref-2)
