# Supplementary material for: The Association Between Healthcare Resources, Non-communicable Diseases, and Covid-19 Mortality: An Epidemiological Study of 139 Countries
Source: Research Square preprint supplement (doi:10.21203/rs.3.rs-379944/v1), 2021-04-22
Supplement: Supplementary file 2 [file 2a3deb7e0df894d7cbab9fa0.docx]

**Supplemental Table 2:** Total country population, population density (people per km2 of land), median age, senior citizens (aged > 65 and aged > 70 years) per population, and life expectancy in 212 countries.

| **Location** | **Population****[[1]](#endnote-1)** | **Population density[[2]](#endnote-2)** | **Median age*** | **Aged 65 older*** | **Aged 70 older*** | **Life expectancy*** |
| --- | --- | --- | --- | --- | --- | --- |
| Afghanistan | 38928341 | 56·94 | 18·60 | 2·58 | 1·34 | 64·83 |
| Albania | 2877800 | 104·61 | 38·00 | 13·19 | 8·64 | 78·57 |
| Algeria | 43851043 | 17·73 | 29·10 | 6·21 | 3·86 | 76·88 |
| Andorra | 77265 | 163·84 | ∙∙ | ∙∙ | ∙∙ | 83·73 |
| Angola | 32866268 | 24·71 | 16·80 | 2·41 | 1·36 | 61·15 |
| Anguilla | 15002 | ∙∙ | ∙∙ | ∙∙ | ∙∙ | 81·88 |
| Antigua and Barbuda | 97928 | 218·83 | 32·10 | 6·93 | 4·63 | 77·02 |
| Argentina | 45195777 | 16·26 | 31·90 | 11·20 | 7·44 | 76·67 |
| Armenia | 2963234 | 103·68 | 35·70 | 11·23 | 7·57 | 75·09 |
| Aruba | 106766 | 588·03 | 41·20 | 13·09 | 7·45 | 76·29 |
| Australia | 25499881 | 3·25 | 37·90 | 15·50 | 10·13 | 83·44 |
| Austria | 9006400 | 107·13 | 44·40 | 19·20 | 13·75 | 81·54 |
| Azerbaijan | 10139175 | 120·23 | 32·40 | 6·02 | 3·87 | 73·00 |
| Bahamas | 393248 | 38·53 | 34·30 | 9·00 | 5·20 | 73·92 |
| Bahrain | 1701583 | 2017·27 | 32·40 | 2·37 | 1·39 | 77·29 |
| Bangladesh | 164689383 | 1239·58 | 27·50 | 5·10 | 3·26 | 72·59 |
| Barbados | 287371 | 666·61 | 39·80 | 14·95 | 9·47 | 79·19 |
| Belarus | 9449321 | 46·72 | 40·30 | 14·80 | 9·79 | 74·79 |
| Belgium | 11589616 | 377·38 | 41·80 | 18·57 | 12·85 | 81·63 |
| Belize | 397621 | 16·79 | 25·00 | 3·85 | 2·28 | 74·62 |
| Benin | 12123198 | 101·85 | 18·80 | 3·24 | 1·94 | 61·77 |
| Bermuda | 62273 | 1183·70 | ∙∙ | ∙∙ | ∙∙ | 82·59 |
| Bhutan | 771612 | 19·78 | 28·60 | 4·89 | 2·98 | 71·78 |
| Bolivia | 11673029 | 10·48 | 25·40 | 6·70 | 4·39 | 71·51 |
| Bonaire Sint Eustatius and Saba | 26221 | ∙∙ | ∙∙ | ∙∙ | ∙∙ | 77·79 |
| Bosnia and Herzegovina | 3280815 | 64·92 | 42·50 | 16·57 | 10·71 | 77·40 |
| Botswana | 2351625 | 3·98 | 25·80 | 3·94 | 2·24 | 69·59 |
| Brazil | 212559409 | 25·06 | 33·50 | 8·55 | 5·06 | 75·88 |
| British Virgin Islands | 30237 | 198·68 | ∙∙ | ∙∙ | ∙∙ | 79·07 |
| Brunei | 437483 | 81·40 | 32·40 | 4·59 | 2·38 | 75·86 |
| Bulgaria | 6948445 | 64·71 | 44·70 | 20·80 | 13·27 | 75·05 |
| Burkina Faso | 20903278 | 72·19 | 17·60 | 2·41 | 1·36 | 61·58 |
| Burundi | 11890781 | 435·18 | 17·50 | 2·56 | 1·50 | 61·58 |
| Cambodia | 16718971 | 92·06 | 25·60 | 4·41 | 2·39 | 69·82 |
| Cameroon | 26545864 | 53·34 | 18·80 | 3·17 | 1·92 | 59·29 |
| Canada | 37742157 | 4·08 | 41·40 | 16·98 | 10·80 | 82·43 |
| Cape Verde | 555988 | 134·93 | 25·70 | 4·46 | 3·44 | 72·98 |
| Cayman Islands | 65720 | 267·39 | ∙∙ | ∙∙ | ∙∙ | 83·92 |
| Central African Republic | 4829764 | 7·49 | 18·30 | 3·66 | 2·25 | 53·28 |
| Chad | 16425859 | 12·29 | 16·70 | 2·49 | 1·45 | 54·24 |
| Chile | 19116209 | 25·19 | 35·40 | 11·09 | 6·94 | 80·18 |
| China | 1439323774 | 148·35 | 38·70 | 10·64 | 5·93 | 76·91 |
| Colombia | 50882884 | 44·75 | 32·20 | 7·65 | 4·31 | 77·29 |
| Comoros | 869595 | 447·24 | 20·40 | 2·96 | 1·73 | 64·32 |
| Congo | 5518092 | 15·36 | 19·00 | 3·40 | 2·06 | 64·57 |
| Costa Rica | 5094114 | 97·91 | 33·60 | 9·47 | 5·69 | 80·28 |
| Cote d'Ivoire | 26378275 | 78·83 | 18·70 | 2·93 | 1·58 | 57·78 |
| Croatia | 4105268 | 73·05 | 44·00 | 19·72 | 13·05 | 78·49 |
| Cuba | 11326616 | 109·00 | 43·10 | 14·74 | 9·72 | 78·80 |
| Curacao | 164100 | ∙∙ | 41·70 | 16·37 | 10·07 | 78·88 |
| Cyprus | 875899 | 128·71 | 37·30 | 13·42 | 8·56 | 80·98 |
| Czech Republic | 10708982 | 137·66 | 43·30 | 19·03 | 11·58 | 79·38 |
| Democratic Republic of Congo | 89561404 | 37·08 | 17·00 | 3·02 | 1·75 | 60·68 |
| Denmark | 5792203 | 137·98 | 42·30 | 19·68 | 12·33 | 80·90 |
| Djibouti | 988002 | 41·37 | 25·40 | 4·21 | 2·38 | 67·11 |
| Dominica | 71991 | 95·50 | ∙∙ | ∙∙ | ∙∙ | 75·00 |
| Dominican Republic | 10847904 | 219·98 | 27·60 | 6·98 | 4·42 | 74·08 |
| Ecuador | 17643060 | 68·79 | 28·10 | 7·10 | 4·46 | 77·01 |
| Egypt | 102334403 | 98·87 | 25·30 | 5·16 | 2·89 | 71·99 |
| El Salvador | 6486201 | 309·88 | 27·60 | 8·27 | 5·42 | 73·32 |
| Equatorial Guinea | 1402985 | 46·67 | 22·40 | 2·85 | 1·75 | 58·74 |
| Eritrea | 3546427 | ∙∙ | 19·30 | 3·61 | 2·17 | 66·32 |
| Estonia | 1326539 | 30·41 | 42·70 | 19·45 | 13·49 | 78·74 |
| Ethiopia | 114963583 | 109·22 | 19·80 | 3·53 | 2·06 | 66·60 |
| Faeroe Islands | 48865 | 34·74 | ∙∙ | ∙∙ | ∙∙ | 80·67 |
| Falkland Islands | 3483 | ∙∙ | ∙∙ | ∙∙ | ∙∙ | 81·44 |
| Fiji | 896444 | 48·36 | 28·60 | 6·22 | 3·28 | 67·44 |
| Finland | 5540718 | 18·15 | 42·80 | 21·23 | 13·26 | 81·91 |
| France | 65273512 | 122·30 | 42·00 | 19·72 | 13·08 | 82·66 |
| French Polynesia | 280904 | 75·87 | 32·70 | 7·78 | 4·59 | 77·66 |
| Gabon | 2225728 | 8·22 | 23·10 | 4·45 | 2·98 | 66·47 |
| Gambia | 2416664 | 225·31 | 17·50 | 2·34 | 1·42 | 62·05 |
| Georgia | 3989175 | 65·20 | 38·70 | 14·86 | 10·24 | 73·77 |
| Germany | 83783945 | 237·31 | 46·60 | 21·45 | 15·96 | 81·33 |
| Ghana | 31072945 | 130·82 | 21·10 | 3·39 | 1·95 | 64·07 |
| Gibraltar | 33691 | 3371·80 | ∙∙ | ∙∙ | ∙∙ | 79·93 |
| Greece | 10423056 | 83·27 | 45·30 | 20·40 | 14·52 | 82·24 |
| Greenland | 56772 | 0·14 | ∙∙ | ∙∙ | ∙∙ | 71·70 |
| Grenada | 112519 | 327·81 | 29·40 | 7·30 | 5·02 | 72·40 |
| Guam | 168783 | 306·98 | 31·40 | 9·55 | 5·49 | 80·07 |
| Guatemala | 17915567 | 152·55 | 22·90 | 4·69 | 3·02 | 74·30 |
| Guernsey | 67052 | ∙∙ | ∙∙ | ∙∙ | ∙∙ |  |
| Guinea | 13132792 | 50·52 | 19·00 | 3·14 | 1·73 | 61·60 |
| Guinea-Bissau | 1967998 | 66·65 | 19·40 | 3·00 | 1·57 | 58·32 |
| Guyana | 786559 | 3·96 | 26·30 | 5·31 | 2·84 | 69·91 |
| Haiti | 11402533 | 403·60 | 24·30 | 4·80 | 2·95 | 64·00 |
| Honduras | 9904608 | 85·69 | 24·90 | 4·65 | 2·88 | 75·27 |
| Hong Kong | 7496988 | 7096·19 | 44·80 | 16·30 | 10·16 | 84·86 |
| Hungary | 9660350 | 107·98 | 43·40 | 18·58 | 11·98 | 76·88 |
| Iceland | 341250 | 3·52 | 37·30 | 14·43 | 9·21 | 82·99 |
| India | 1380004385 | 454·94 | 28·20 | 5·99 | 3·41 | 69·66 |
| Indonesia | 273523621 | 147·75 | 29·30 | 5·32 | 3·05 | 71·72 |
| Iran | 83992953 | 50·22 | 32·40 | 5·44 | 3·18 | 76·68 |
| Iraq | 40222503 | 88·53 | 20·00 | 3·19 | 1·96 | 70·60 |
| Ireland | 4937796 | 70·65 | 38·70 | 13·93 | 8·68 | 82·30 |
| Isle of Man | 85032 | 147·50 | ∙∙ | ∙∙ | ∙∙ | 81·40 |
| Israel | 8655541 | 410·48 | 30·60 | 11·73 | 7·36 | 82·97 |
| Italy | 60461828 | 205·42 | 47·90 | 23·02 | 16·24 | 83·51 |
| Jamaica | 2961161 | 270·99 | 31·40 | 9·68 | 6·39 | 74·47 |
| Japan | 126476458 | 347·07 | 48·20 | 27·05 | 18·49 | 84·63 |
| Jersey | 101073 | ∙∙ | ∙∙ | ∙∙ | ∙∙ | ∙∙ |
| Jordan | 10203140 | 112·14 | 23·20 | 3·81 | 2·36 | 74·53 |
| Kazakhstan | 18776707 | 6·77 | 30·60 | 6·99 | 4·63 | 73·60 |
| Kenya | 53771300 | 90·30 | 20·00 | 2·69 | 1·53 | 66·70 |
| Kosovo | 1932774 | ∙∙ | ∙∙ | ∙∙ | ∙∙ | ∙∙ |
| Kuwait | 4270563 | 232·17 | 33·70 | 2·35 | 1·11 | 75·49 |
| Kyrgyzstan | 6524191 | 32·97 | 26·30 | 4·49 | 2·88 | 71·45 |
| Laos | 7275556 | 30·60 | 24·40 | 4·03 | 2·32 | 67·92 |
| Latvia | 1886202 | 30·99 | 43·90 | 19·75 | 14·14 | 75·29 |
| Lebanon | 6825442 | 669·49 | 31·10 | 8·51 | 5·43 | 78·93 |
| Lesotho | 2142252 | 69·44 | 22·20 | 4·51 | 2·65 | 54·33 |
| Liberia | 5057677 | 50·03 | 19·20 | 3·06 | 1·76 | 64·10 |
| Libya | 6871287 | 3·80 | 29·00 | 4·42 | 2·82 | 72·91 |
| Liechtenstein | 38137 | 236·94 | ∙∙ | ∙∙ | ∙∙ | 82·49 |
| Lithuania | 2722291 | 44·72 | 43·50 | 19·00 | 13·78 | 75·93 |
| Luxembourg | 625976 | 250·19 | 39·70 | 14·31 | 9·84 | 82·25 |
| Macedonia | 2083380 | 82·59 | 39·10 | 13·26 | 8·16 | 75·80 |
| Madagascar | 27691019 | 45·14 | 19·60 | 2·93 | 1·69 | 67·04 |
| Malawi | 19129955 | 192·44 | 18·10 | 2·98 | 1·78 | 64·26 |
| Malaysia | 32365998 | 95·96 | 29·90 | 6·29 | 3·41 | 76·16 |
| Maldives | 540542 | 1718·99 | 30·60 | 4·12 | 2·88 | 78·92 |
| Mali | 20250834 | 15·64 | 16·40 | 2·52 | 1·49 | 59·31 |
| Malta | 441539 | 1514·47 | 42·40 | 19·43 | 11·32 | 82·53 |
| Marshall Islands | 59194 | 324·52 | ∙∙ | ∙∙ | ∙∙ | 73·70 |
| Mauritania | 4649660 | 4·27 | 20·30 | 3·14 | 1·79 | 64·92 |
| Mauritius | 1271767 | 623·30 | 37·40 | 10·95 | 5·88 | 74·99 |
| Mexico | 128932753 | 64·91 | 29·30 | 6·86 | 4·32 | 75·05 |
| Moldova | 4033963 | 94·26 | 37·60 | 10·86 | 6·96 | 71·90 |
| Monaco | 39244 | ∙∙ | ∙∙ | ∙∙ | ∙∙ | 86·75 |
| Mongolia | 3278292 | 2·04 | 28·60 | 4·03 | 2·42 | 69·87 |
| Montenegro | 628062 | 46·26 | 39·10 | 14·76 | 9·40 | 76·88 |
| Montserrat | 4999 | ∙∙ | ∙∙ | ∙∙ | ∙∙ | 74·16 |
| Morocco | 36910558 | 80·73 | 29·60 | 6·77 | 4·21 | 76·68 |
| Mozambique | 31255435 | 37·51 | 17·70 | 3·16 | 1·87 | 60·85 |
| Myanmar | 54409794 | 82·24 | 29·10 | 5·73 | 3·12 | 67·13 |
| Namibia | 2540916 | 2·97 | 22·00 | 3·55 | 2·09 | 63·71 |
| Nepal | 29136808 | 195·94 | 25·00 | 5·81 | 3·21 | 70·78 |
| Netherlands | 17134873 | 511·48 | 43·20 | 18·78 | 11·88 | 82·28 |
| New Caledonia | 285491 | 15·54 | 33·40 | 9·95 | 6·49 | 77·55 |
| New Zealand | 4822233 | 18·39 | 37·90 | 15·32 | 9·72 | 82·29 |
| Nicaragua | 6624554 | 53·73 | 27·30 | 5·45 | 3·52 | 74·48 |
| Niger | 24206636 | 17·72 | 15·10 | 2·55 | 1·38 | 62·42 |
| Nigeria | 206139587 | 215·06 | 18·10 | 2·75 | 1·45 | 54·69 |
| Northern Mariana Islands | 57557 | 123·66 | ∙∙ | ∙∙ | ∙∙ | 76·74 |
| Norway | 5421242 | 14·55 | 39·70 | 16·82 | 10·81 | 82·40 |
| Oman | 5106622 | 15·60 | 30·70 | 2·36 | 1·53 | 77·86 |
| Pakistan | 220892331 | 275·29 | 23·50 | 4·50 | 2·78 | 67·27 |
| Palestine | 5101416 |  | 20·40 | 3·04 | 1·73 | 74·05 |
| Panama | 4314768 | 56·19 | 29·70 | 7·92 | 5·03 | 78·51 |
| Papua New Guinea | 8947027 | 19·00 | 22·60 | 3·81 | 2·14 | 64·50 |
| Paraguay | 7132530 | 17·51 | 26·50 | 6·38 | 3·83 | 74·25 |
| Peru | 32971846 | 24·99 | 29·10 | 7·15 | 4·46 | 76·74 |
| Philippines | 109581085 | 357·69 | 25·20 | 4·80 | 2·66 | 71·23 |
| Poland | 37846605 | 124·02 | 41·80 | 16·76 | 10·20 | 78·73 |
| Portugal | 10196707 | 112·26 | 46·20 | 21·50 | 14·92 | 82·05 |
| Puerto Rico | 2860840 | 360·02 | 38·20 | 15·17 | 9·83 | 80·10 |
| Qatar | 2881060 | 239·59 | 31·90 | 1·31 | 0·62 | 80·23 |
| Romania | 19237682 | 84·63 | 43·00 | 17·85 | 11·69 | 76·05 |
| Russia | 145934460 | 8·82 | 39·60 | 14·18 | 9·39 | 72·58 |
| Rwanda | 12952209 | 498·66 | 20·30 | 2·97 | 1·64 | 69·02 |
| Saint Kitts and Nevis | 53192 | 201·70 | ∙∙ | ∙∙ | ∙∙ | 76·23 |
| Saint Lucia | 183629 | 298·18 | 34·90 | 9·72 | 6·41 | 76·20 |
| Saint Vincent and the Grenadines | 110947 | 282·59 | 31·80 | 7·72 | 4·83 | 72·53 |
| San Marino | 33938 | 563·08 | ∙∙ | ∙∙ | ∙∙ | 84·97 |
| Sao Tome and Principe | 219161 | 219·82 | 18·70 | 2·89 | 2·16 | 70·39 |
| Saudi Arabia | 34813867 | 15·68 | 31·90 | 3·30 | 1·85 | 75·13 |
| Senegal | 16743930 | 82·35 | 18·70 | 3·01 | 1·80 | 67·94 |
| Serbia | 6804596 | 79·84 | 41·20 | 17·37 | ∙∙ | 76·00 |
| Seychelles | 98340 | 210·35 | 36·20 | 8·61 | 5·59 | 73·40 |
| Sierra Leone | 7976985 | 105·99 | 19·10 | 2·54 | 1·29 | 54·70 |
| Singapore | 5850343 | 7953·00 | 42·40 | 12·92 | 7·05 | 83·62 |
| Sint Maarten (Dutch part) | 42882 | ∙∙ | ∙∙ | ∙∙ | ∙∙ | 78·95 |
| Slovakia | 5459643 | 113·29 | 41·20 | 15·07 | 9·17 | 77·54 |
| Slovenia | 2078932 | 102·96 | 44·50 | 19·06 | 12·93 | 81·32 |
| Solomon Islands | 686878 | 23·32 | 20·80 | 3·51 | 2·04 | 73·00 |
| Somalia | 15893219 | 23·92 | 16·80 | 2·73 | 1·50 | 57·40 |
| South Africa | 59308690 | 47·63 | 27·30 | 5·34 | 3·05 | 64·13 |
| South Korea | 51269183 | 529·36 | 43·40 | 13·91 | 8·62 | 83·03 |
| South Sudan | 11193729 |  | 19·20 | 3·44 | 2·03 | 57·85 |
| Spain | 46754783 | 93·68 | 45·50 | 19·44 | 13·80 | 83·56 |
| Sri Lanka | 21413250 | 345·56 | 34·10 | 10·07 | 5·33 | 76·98 |
| Sudan | 43849269 | ∙∙ | 19·70 | 3·55 | 2·03 | 65·31 |
| Suriname | 586634 | 3·69 | 29·60 | 6·93 | 4·23 | 71·68 |
| Swaziland | 1160164 | 66·06 | 21·50 | 3·16 | 1·85 | 60·19 |
| Sweden | 10099270 | 24·98 | 41·00 | 19·99 | 13·43 | 82·80 |
| Switzerland | 8654618 | 215·47 | 43·10 | 18·44 | 12·64 | 83·78 |
| Syria | 17500657 | 92·07 | 21·70 | ∙∙ | 2·58 | 72·70 |
| Taiwan | 23816775 | ∙∙ | 42·20 | ∙∙ | 8·35 | 80·46 |
| Tajikistan | 9537642 | 65·57 | 23·30 | 3·47 | 2·16 | 71·10 |
| Tanzania | 59734213 | 63·58 | 17·70 | 3·11 | 1·87 | 65·46 |
| Thailand | 69799978 | 135·90 | 40·10 | 11·37 | 6·89 | 77·15 |
| Timor | 1318442 | 85·27 | 18·00 | 3·56 | 1·90 | 69·50 |
| Togo | 8278737 | 145·05 | 19·40 | 2·84 | 1·53 | 61·04 |
| Trinidad and Tobago | 1399491 | 270·93 | 36·20 | 10·01 | 5·82 | 73·51 |
| Tunisia | 11818618 | 74·44 | 32·70 | 8·00 | 5·08 | 76·70 |
| Turkey | 84339067 | 106·96 | 31·60 | 8·15 | 5·06 | 77·69 |
| Turks and Caicos Islands | 38718 | 39·65 | ∙∙ | ∙∙ | ∙∙ | 80·22 |
| Uganda | 45741000 | 213·06 | 16·40 | 2·17 | 1·31 | 63·37 |
| Ukraine | 43733759 | 77·03 | 41·40 | 16·46 | 11·13 | 72·06 |
| United Arab Emirates | 9890400 | 135·61 | 34·00 | 1·14 | 0·53 | 77·97 |
| United Kingdom | 67886004 | 274·71 | 40·80 | 18·52 | 12·53 | 81·32 |
| United States | 331002647 | 35·71 | 38·30 | 15·41 | 9·73 | 78·86 |
| United States Virgin Islands | 104423 | 305·65 | 42·20 | 18·60 | 10·80 | 80·58 |
| Uruguay | 3473727 | 19·71 | 35·60 | 14·66 | 10·36 | 77·91 |
| Uzbekistan | 33469199 | 77·47 | 28·20 | 4·47 | 2·87 | 71·72 |
| Vanuatu | 307150 | 24·01 | 23·10 | 4·39 | 2·62 | 70·47 |
| Vatican | 809 | ∙∙ | ∙∙ | ∙∙ | ∙∙ | 75·12 |
| Venezuela | 28435943 | 32·73 | 29·00 | 6·61 | 3·92 | 72·06 |
| Vietnam | 97338583 | 308·13 | 32·60 | 7·15 | 4·72 | 75·40 |
| Wallis and Futuna | 11246 | 758·98 | ∙∙ | ∙∙ | ∙∙ | 79·94 |
| Western Sahara | 597330 | ∙∙ | 28·40 | ∙∙ | 1·38 | 70·26 |
| Yemen | 29825968 | 53·98 | 20·30 | 2·92 | 1·58 | 66·12 |
| Zambia | 18383956 | 23·34 | 17·70 | 2·48 | 1·54 | 63·89 |
| Zimbabwe | 14862927 | 37·32 | 19·60 | 2·82 | 1·88 | 61·49 |
| World | 7794798729 | 59·62 | 30·90 | 8·70 | 5·36 | 72·58 |

1. Database: Our World in Data. [↑](#endnote-ref-1)
2. Database: World Bank in 2018. [↑](#endnote-ref-2)
