# Supplementary material for: The Association Between Healthcare Resources, Non-communicable Diseases, and Covid-19 Mortality: An Epidemiological Study of 139 Countries
Source: Research Square preprint supplement (doi:10.21203/rs.3.rs-379944/v1), 2021-04-22
Supplement: Supplementary file 3 [file 61fa8aeaf9f5fbe46c72be3e.docx]

**Supplemental Table 3:** Healthcare resources, number of hospital beds, physicians, nurses and midwives per 10,000 population, gross domestic product per capita, and out-of-pocket payments in 162 countries.

| **World Bank classification** | **Location** | **Hospital beds****[[1]](#endnote-1)** | **Physicians*** | **Nurses and midwives*** | **GDP per capita[[2]](#endnote-2)** | **out-of-pocket payments*** |
| --- | --- | --- | --- | --- | --- | --- |
| Low-income | Afghanistan | 5·00 | 2·82 | 1·51 | 1803·99 | 63·88 |
| Upper-middle-income | Albania | 28·89 | 12·16 | 36·50 | 11803·43 | 49·93 |
| Lower-middle-income | Algeria | 19·00 | 17·80 | 20·05 | 13913·84 | 26·50 |
| High-income | Andorra | 25·00 | 33·33 | 40·13 | 37960·00 | 15·94 |
| Lower-middle-income | Angola | 8·00 | 2·15 | 4·08 | 5819·50 | 23·96 |
| Upper-middle-income | Argentina | 49·48 | 39·96 | 25·91 | 18933·91 | 30·73 |
| Upper-middle-income | Armenia | 41·12 | 36·58 | 55·31 | 8787·58 | 53·51 |
| High-income | Australia | 38·05 | 35·78 | 123·87 | 44648·71 | 18·82 |
| High-income | Austria | 74·80 | 51·32 | 53·46 | 45436·69 | 16·15 |
| Upper-middle-income | Azerbaijan | 47·55 | 34·46 | 64·34 | 15847·42 | 72·08 |
| High-income | Bahamas | 28·40 | 20·07 | 39·09 | 27717·85 | 29·23 |
| High-income | Bahrain | 19·50 | 9·26 | 24·94 | 43290·71 | 23·34 |
| Lower-middle-income | Bangladesh | 7·70 | 5·27 | 3·17 | 3523·98 | 66·98 |
| High-income | Barbados | 59·25 | 24·84 | 30·40 | 16978·07 | 29·87 |
| Upper-middle-income | Belarus | 109·40 | 51·91 | 110·00 | 17167·97 | 32·03 |
| High-income | Belgium | 57·60 | 30·51 | 155·55 | 42658·58 | 17·81 |
| Upper-middle-income | Belize | 11·26 | 11·23 | 220·85 | 7824·36 | 23·01 |
| Lower-middle-income | Benin | 5·00 | 0·64 | 5·75 | 2064·24 | 39·10 |
| Lower-middle-income | Bhutan | 17·00 | 3·94 | 16·23 | 8708·60 | 25·33 |
| Lower-middle-income | Bolivia | 11·48 | 15·90 | 12·89 | 6885·83 | 23·11 |
| Upper-middle-income | Bosnia and Herzegovina | 34·96 | 21·62 | 57·38 | 11713·90 | 27·93 |
| Upper-middle-income | Botswana | 18·00 | 5·27 | 47·59 | 15807·37 | 5·19 |
| Upper-middle-income | Brazil | 21·45 | 21·65 | 95·79 | 14103·45 | 25·47 |
| Upper-middle-income | Bulgaria | 72·35 | 40·33 | 48·16 | 18563·31 | 44·19 |
| Low-income | Burkina Faso | 4·00 | 0·72 | 7·37 | 1703·10 | 39·09 |
| Low-income | Burundi | 7·90 | 0·75 | 7·60 | 702·23 | 21·02 |
| Lower-middle-income | Cameroon | 14·00 | 0·88 | 0·06 | 3364·93 | 66·31 |
| High-income | Canada | 26·00 | 23·11 | 98·98 | 44017·59 | 13·60 |
| Low-income | Central African Republic | 10·00 | 0·72 | 2·06 | 661·24 | 46·22 |
| Low-income | Chad | 4·30 | 0·46 | 2·43 | 1768·15 | 39·15 |
| High-income | Chile | 21·20 | 23·68 | 119·20 | 22767·04 | 31·52 |
| Upper-middle-income | China | 37·90 | 18·73 | 24·73 | 15308·71 | 31·99 |
| Upper-middle-income | Colombia | 16·45 | 20·75 | 12·47 | 13254·95 | 15·36 |
| Lower-middle-income | Comoros | 22·00 | 2·72 | 6·29 | 1413·89 | 45·06 |
| Lower-middle-income | Congo | 16·00 | 36·92 | 7·22 | 4881·41 | 17·51 |
| Upper-middle-income | Costa Rica | 11·50 | 21·51 | 30·64 | 15525·00 | 24·87 |
| Lower-middle-income | Côte d'Ivoire | 4·00 | 2·31 | 5·35 | 3601·01 | 50·81 |
| High-income | Croatia | 55·63 | 30·87 | 71·57 | 22669·80 | 11·21 |
| Upper-middle-income | Cuba | 52·40 | 65·00 | 77·16 | 8821·82 | 4·39 |
| High-income | Cyprus | 34·15 | 22·88 | 46·43 | 32415·13 | 48·71 |
| High-income | Czech Republic | 66·65 | 40·40 | 83·89 | 32605·91 | 14·33 |
| Low-income | Democratic Republic of Congo | 8·00 | 0·74 | 7·45 | 808·13 | 38·77 |
| High-income | Denmark | 26·00 | 39·68 | 102·80 | 46682·52 | 13·36 |
| Lower-middle-income | Djibouti | 14·00 | 2·24 | 7·29 | 2705·41 | 35·84 |
| Upper-middle-income | Dominican Republic | 15·80 | 15·27 | 13·03 | 14600·86 | 21·14 |
| Upper-middle-income | Ecuador | 15·30 | 20·51 | 26·75 | 10581·94 | 48·43 |
| Lower-middle-income | Egypt | 14·30 | 7·24 | 19·30 | 10550·21 | 55·66 |
| Lower-middle-income | El Salvador | 10·73 | 15·66 | 18·09 | 7292·46 | 28·85 |
| Upper-middle-income | Equatorial Guinea | 21·00 | 4·02 | 5·02 | 22604·87 | 20·15 |
| Low-income | Eritrea | 7·00 | 0·63 | 13·48 | 1510·46 | 54·24 |
| High-income | Estonia | 48·60 | 37·04 | 76·18 | 29481·25 | 20·72 |
| Low-income | Ethiopia | 3·30 | 0·74 | 5·53 | 1729·93 | 32·26 |
| High-income | Finland | 41·60 | 35·72 | 78·05 | 40585·72 | 18·23 |
| High-income | France | 60·95 | 32·47 | 110·30 | 38605·67 | 6·34 |
| Upper-middle-income | Gabon | 63·00 | 5·19 | 27·45 | 16562·41 | 21·87 |
| Low-income | Gambia | 12·00 | 1·02 | 15·45 | 1561·77 | 17·05 |
| Upper-middle-income | Georgia | 27·40 | 60·63 | 44·01 | 9745·08 | 58·58 |
| High-income | Germany | 81·30 | 41·92 | 130·97 | 45229·25 | 13·20 |
| Lower-middle-income | Ghana | 9·00 | 1·32 | 26·68 | 4227·63 | 26·84 |
| High-income | Greece | 42·25 | 53·79 | 35·62 | 24574·38 | 34·86 |
| Upper-middle-income | Guatemala | 5·12 | 3·55 | 0·64 | 7423·81 | 52·22 |
| Low-income | Guinea | 4·00 | 0·85 | 2·71 | 1998·93 | 45·33 |
| Low-income | Guinea-Bissau | 10·00 | 1·66 | 6·11 | 1548·68 | 49·49 |
| Upper-middle-income | Guyana | 17·18 | 8·02 | 8·14 | 7435·05 | 37·44 |
| Low-income | Haiti | 7·07 | 1·60 | 4·81 | 1653·17 | 34·82 |
| Lower-middle-income | Honduras | 6·43 | 4·54 | 7·22 | 4541·80 | 43·46 |
| High-income | Hungary | 70·05 | 32·76 | 67·62 | 26777·56 | 26·59 |
| High-income | Iceland | 31·20 | 39·32 | 158·48 | 46482·96 | 17·48 |
| Lower-middle-income | India | 5·20 | 7·98 | 16·95 | 6426·67 | 62·42 |
| Upper-middle-income | Indonesia | 9·90 | 3·59 | 19·22 | 11188·74 | 46·87 |
| Upper-middle-income | Iran | 15·00 | 12·89 | 16·54 | 19082·62 | 47·80 |
| Upper-middle-income | Iraq | 13·20 | 8·00 | 18·06 | 15663·99 | 39·73 |
| High-income | Ireland | 29·40 | 32·48 | 160·13 | 67335·29 | 17·66 |
| High-income | Israel | 30·25 | 37·57 | 42·65 | 33132·32 | 26·98 |
| High-income | Italy | 31·90 | 39·39 | 58·38 | 35220·08 | 21·19 |
| Upper-middle-income | Jamaica | 17·06 | 7·25 | 13·33 | 8193·57 | 27·81 |
| High-income | Japan | 131·40 | 24·12 | 120·50 | 39002·22 | 13·91 |
| Upper-middle-income | Jordan | 14·70 | 21·76 | 21·30 | 8337·49 | 20·87 |
| Upper-middle-income | Kazakhstan | 63·88 | 39·80 | 72·94 | 24055·59 | 45·14 |
| Lower-middle-income | Kenya | 14·00 | 1·57 | 10·32 | 2993·03 | 26·11 |
| High-income | Kuwait | 20·40 | 26·46 | 72·51 | 65530·54 | 12·74 |
| Lower-middle-income | Kyrgyzstan | 44·63 | 22·13 | 59·45 | 3393·47 | 39·40 |
| High-income | Latvia | 56·75 | 31·82 | 47·98 | 25063·85 | 35·13 |
| Upper-middle-income | Lebanon | 28·50 | 20·61 | 16·08 | 13367·57 | 36·42 |
| Lower-middle-income | Lesotho | 13·00 | 0·69 | 32·57 | 2851·15 | 16·48 |
| Low-income | Liberia | 8·00 | 0·38 | 3·17 | 752·79 | 30·73 |
| Upper-middle-income | Libya | 37·00 | 19·93 | 65·31 | 17881·51 | 26·46 |
| High-income | Lithuania | 68·30 | 50·53 | 84·24 | 29524·27 | 31·27 |
| High-income | Luxembourg | 48·10 | 29·45 | 122·20 | 94277·97 | 10·60 |
| Upper-middle-income | Macedonia | 43·88 | 28·74 | 37·92 | 13111·21 | 36·67 |
| Low-income | Madagascar | 2·00 | 1·81 | 1·46 | 1416·44 | 41·36 |
| Low-income | Malawi | 13·00 | 0·27 | 3·69 | 1095·04 | 10·64 |
| Upper-middle-income | Malaysia | 18·60 | 15·36 | 34·08 | 26808·16 | 35·30 |
| Upper-middle-income | Maldives | 43·00 | 37·24 | 64·98 | 15183·62 | 18·26 |
| Low-income | Mali | 1·00 | 1·35 | 3·86 | 2014·31 | 47·66 |
| High-income | Malta | 45·89 | 28·60 | 89·27 | 36513·32 | 28·86 |
| Lower-middle-income | Mauritania | 4·00 | 1·81 | 10·05 | 3597·63 | 43·85 |
| High-income | Mauritius | 34·00 | 22·67 | 33·91 | 20292·75 | 46·42 |
| Upper-middle-income | Mexico | 10·00 | 23·44 | 24·58 | 17336·47 | 44·00 |
| Lower-middle-income | Moldova | 57·48 | 28·46 | 49·64 | 5189·97 | 38·39 |
| High-income | Monaco | 138·00 | 62·00 | 201·60 | 85535·38 | 7·00 |
| Lower-middle-income | Mongolia | 70·00 | 30·39 | 38·98 | 11840·85 | 41·63 |
| Upper-middle-income | Montenegro | 39·31 | 25·66 | 52·88 | 16409·29 | 42·84 |
| Lower-middle-income | Morocco | 11·00 | 7·31 | 13·89 | 7485·01 | 58·41 |
| Low-income | Mozambique | 7·00 | 0·63 | 6·72 | 1136·10 | 9·48 |
| Lower-middle-income | Myanmar | 10·42 | 7·20 | 10·13 | 5591·60 | 50·69 |
| Upper-middle-income | Namibia | 27·00 | 5·05 | 19·76 | 9541·81 | 7·17 |
| Lower-middle-income | Nepal | 3·00 | 8·30 | 29·78 | 2442·80 | 47·65 |
| High-income | Netherlands | 34·10 | 35·48 | 109·53 | 48472·55 | 5·22 |
| High-income | New Zealand | 27·30 | 34·36 | 122·23 | 36085·84 | 11·04 |
| Low-income | Niger | 3·50 | 0·45 | 2·37 | 926·00 | 34·33 |
| Lower-middle-income | Nigeria | 5·00 | 4·15 | 14·67 | 5338·45 | 71·67 |
| High-income | Norway | 37·20 | 27·74 | 180·58 | 64800·06 | 13·61 |
| High-income | Oman | 15·60 | 19·94 | 43·53 | 37960·71 | 5·78 |
| Lower-middle-income | Pakistan | 6·00 | 9·67 | 5·57 | 5034·71 | 56·28 |
| High-income | Panama | 22·70 | 15·69 | 29·77 | 22267·04 | 22·27 |
| Upper-middle-income | Paraguay | 8·28 | 13·54 | 9·43 | 8827·01 | 49·42 |
| Upper-middle-income | Peru | 15·59 | 13·05 | 22·24 | 12236·71 | 28·62 |
| Lower-middle-income | Philippines | 9·90 | 6·00 | 51·05 | 7599·19 | 53·69 |
| High-income | Poland | 66·25 | 23·73 | 60·34 | 27216·45 | 23·46 |
| High-income | Portugal | 33·90 | 49·38 | 67·23 | 27936·90 | 26·84 |
| High-income | Qatar | 12·00 | 25·90 | 68·28 | 116935·60 | 6·86 |
| High-income | Romania | 67·91 | 26·19 | 67·41 | 23313·20 | 18·87 |
| Upper-middle-income | Russia | 82·55 | 37·49 | 86·84 | 24765·95 | 45·85 |
| Low-income | Rwanda | 16·00 | 1·27 | 11·23 | 1854·21 | 28·13 |
| High-income | San Marino | 38·00 | 61·09 | 82·07 | 56861·47 | 5·82 |
| Lower-middle-income | Sao Tome and Principe | 29·00 | 1·85 | 13·84 | 3052·71 | 11·19 |
| High-income | Saudi Arabia | 22·30 | 25·09 | 55·37 | 49045·41 | 14·31 |
| Lower-middle-income | Senegal | 3·20 | 1·16 | 2·68 | 2470·58 | 37·28 |
| Upper-middle-income | Serbia | 55·80 | 27·87 | 68·52 | 14048·88 | 36·59 |
| Low-income | Sierra Leone | 4·00 | 0·25 | 2·24 | 1390·30 | 60·96 |
| High-income | Singapore | 23·95 | 22·94 | 61·40 | 85535·38 | 54·83 |
| High-income | Slovakia | 57·85 | 34·42 | 41·32 | 30155·15 | 22·54 |
| High-income | Slovenia | 45·05 | 29·67 | 94·99 | 31400·84 | 12·07 |
| Upper-middle-income | South Africa | 23·00 | 8·29 | 13·03 | 12294·88 | 6·49 |
| High-income | South Korea | 117·95 | 23·05 | 68·57 | 35938·37 | 36·09 |
| Low-income | South Sudan | 7·00 | 2·62 | 6·95 | 1569·89 | 54·15 |
| High-income | Spain | 29·70 | 36·33 | 54·96 | 34272·36 | 24·00 |
| Lower-middle-income | Sri Lanka | 41·50 | 9·22 | 20·22 | 11669·08 | 42·09 |
| Low-income | Sudan | 8·20 | 3·35 | 7·60 | 4466·51 | 75·52 |
| Upper-middle-income | Suriname | 30·24 | 11·43 | 21·82 | 13767·12 | 11·40 |
| Lower-middle-income | Swaziland | 21·00 | 3·29 | 38·63 | 7738·98 | 10·29 |
| High-income | Sweden | 23·90 | 41·35 | 117·67 | 46949·28 | 14·06 |
| High-income | Switzerland | 47·10 | 42·44 | 172·43 | 57410·17 | 26·80 |
| Low-income | Syria | 14·70 | 12·87 | 15·41 | 2032·00 | 53·69 |
| Low-income | Tajikistan | 47·12 | 17·00 | 47·53 | 2896·91 | 61·69 |
| Low-income | Togo | 7·00 | 0·42 | 3·62 | 1429·81 | 46·24 |
| High-income | Trinidad and Tobago | 30·10 | 33·94 | 43·71 | 28763·07 | 37·98 |
| Lower-middle-income | Tunisia | 21·80 | 12·99 | 26·14 | 10849·30 | 37·73 |
| Upper-middle-income | Turkey | 27·15 | 18·21 | 26·35 | 25129·34 | 17·75 |
| Low-income | Uganda | 5·00 | 1·32 | 14·76 | 1697·71 | 40·96 |
| Lower-middle-income | Ukraine | 81·31 | 44·00 | 66·61 | 7894·39 | 46·22 |
| High-income | United Arab Emirates | 11·50 | 23·87 | 54·81 | 67293·48 | 17·81 |
| High-income | United Kingdom | 25·70 | 27·75 | 82·42 | 39753·24 | 9·73 |
| High-income | United States | 28·30 | 25·93 | 145·50 | 54225·45 | 11·05 |
| High-income | Uruguay | 24·34 | 45·18 | 19·41 | 20551·41 | 15·58 |
| Lower-middle-income | Uzbekistan | 39·86 | 23·70 | 112·80 | 6253·10 | 43·93 |
| Upper-middle-income | Venezuela | 8·20 | 21·00 | 9·42 | 16745·02 | 64·33 |
| Lower-middle-income | Vietnam | 31·80 | 8·12 | 14·35 | 6171·88 | 36·76 |
| Low-income | Yemen | 7·10 | 5·25 | 7·57 | 1479·15 | 76·42 |
| Lower-middle-income | Zambia | 20·00 | 6·75 | 9·47 | 3689·25 | 29·99 |
| Lower-middle-income | Zimbabwe | 17·00 | 1·89 | 18·29 | 1899·78 | 35·94 |

1. Database: World Health Organization [↑](#endnote-ref-1)
2. Database: Our World in Data (2017) [↑](#endnote-ref-2)
