# Supplementary material for: The Association Between Healthcare Resources, Non-communicable Diseases, and Covid-19 Mortality: An Epidemiological Study of 139 Countries
Source: Research Square preprint supplement (doi:10.21203/rs.3.rs-379944/v1), 2021-04-22
Supplement: Supplementary file 4 [file fe0abebebae35a962bc7f258.docx]

**Supplemental Table 1:** COVID-19 cases and deaths per one million population, total cases, and total deaths as of November 21, 2020 in 211 countries.

| **Location** | **Date** | **Total cases** | **Total deaths** | **Total cases per million** | **Total deaths per million** |
| --- | --- | --- | --- | --- | --- |
| Afghanistan | 2020-11-21 | 44365 | 1675 | 1139·66 | 43·03 |
| Albania | 2020-11-21 | 31459 | 672 | 10931·61 | 233·51 |
| Algeria | 2020-11-21 | 72755 | 2239 | 1659·14 | 51·06 |
| Andorra | 2020-11-21 | 6142 | 76 | 79492·66 | 983·63 |
| Angola | 2020-11-21 | 14134 | 333 | 430·05 | 10·13 |
| Anguilla | 2020-11-21 | 3 | ∙∙ | 199·97 | ∙∙ |
| Antigua and Barbuda | 2020-11-21 | 139 | 4 | 1419·41 | 40·85 |
| Argentina | 2020-11-21 | 1359026 | 36790 | 30069·76 | 814·01 |
| Armenia | 2020-11-21 | 124839 | 1931 | 42129·31 | 651·65 |
| Aruba | 2020-11-21 | 4698 | 45 | 44002·77 | 421·48 |
| Australia | 2020-11-21 | 27789 | 907 | 1089·77 | 35·57 |
| Austria | 2020-11-21 | 234670 | 2097 | 26055·92 | 232·83 |
| Azerbaijan | 2020-11-21 | 87163 | 1079 | 8596·66 | 106·42 |
| Bahamas | 2020-11-21 | 7367 | 163 | 18733·73 | 414·50 |
| Bahrain | 2020-11-21 | 85467 | 338 | 50227·94 | 198·64 |
| Bangladesh | 2020-11-21 | 443434 | 6322 | 2692·55 | 38·39 |
| Barbados | 2020-11-21 | 253 | 7 | 880·40 | 24·36 |
| Belarus | 2020-11-21 | 120847 | 1081 | 12788·96 | 114·40 |
| Belize | 2020-11-21 | 5056 | 107 | 12715·63 | 269·10 |
| Benin | 2020-11-21 | 2916 | 43 | 240·53 | 3·55 |
| Bermuda | 2020-11-21 | 227 | 9 | 3645·24 | 144·53 |
| Bhutan | 2020-11-21 | 378 | ∙∙ | 489·88 | ∙∙ |
| Bolivia | 2020-11-21 | 143755 | 8889 | 12315·14 | 761·50 |
| Bonaire Sint Eustatius and Saba | 2020-11-21 | 158 | 3 | 6025·71 | 114·41 |
| Bosnia and Herzegovina | 2020-11-21 | 77994 | 2209 | 23772·75 | 673·31 |
| Botswana | 2020-11-21 | 9594 | 31 | 4079·73 | 13·18 |
| Brazil | 2020-11-21 | 6020164 | 168613 | 28322·27 | 793·25 |
| British Virgin Islands | 2020-11-21 | 72 | 1 | 2381·19 | 33·07 |
| Brunei | 2020-11-21 | 148 | 3 | 338·30 | 6·86 |
| Bulgaria | 2020-11-21 | 118418 | 2778 | 17042·37 | 399·80 |
| Burkina Faso | 2020-11-21 | 2686 | 68 | 128·50 | 3·25 |
| Burundi | 2020-11-21 | 649 | 1 | 54·58 | 0·08 |
| Cambodia | 2020-11-21 | 305 | ∙∙ | 18·24 | ∙∙ |
| Cameroon | 2020-11-21 | 23528 | 435 | 886·32 | 16·39 |
| Canada | 2020-11-21 | 320719 | 11334 | 8497·63 | 300·30 |
| Cape Verde | 2020-11-21 | 10152 | 104 | 18259·39 | 187·05 |
| Cayman Islands | 2020-11-21 | 261 | 2 | 3971·39 | 30·43 |
| Central African Republic | 2020-11-21 | 4911 | 63 | 1016·82 | 13·04 |
| Chad | 2020-11-21 | 1626 | 101 | 98·99 | 6·15 |
| Chile | 2020-11-21 | 537585 | 15003 | 28121·95 | 784·83 |
| China | 2020-11-21 | 91704 | 4739 | 63·71 | 3·29 |
| Colombia | 2020-11-21 | 1233444 | 34929 | 24240·84 | 686·46 |
| Comoros | 2020-11-21 | 592 | 7 | 680·78 | 8·05 |
| Congo | 2020-11-21 | 5632 | 92 | 1020·64 | 16·67 |
| Costa Rica | 2020-11-21 | 129418 | 1608 | 25405·40 | 315·66 |
| Cote d'Ivoire | 2020-11-21 | 21099 | 129 | 799·86 | 4·89 |
| Croatia | 2020-11-21 | 96837 | 1257 | 23588·47 | 306·19 |
| Cuba | 2020-11-21 | 7763 | 131 | 685·38 | 11·57 |
| Curacao | 2020-11-21 | 1620 | 3 | 9872·03 | 18·28 |
| Cyprus | 2020-11-21 | 8211 | 43 | 9374·37 | 49·09 |
| Czech Republic | 2020-11-21 | 487563 | 7021 | 45528·42 | 655·62 |
| Democratic Republic of Congo | 2020-11-21 | 12128 | 323 | 135·42 | 3·61 |
| Denmark | 2020-11-21 | 68362 | 778 | 11802·42 | 134·32 |
| Djibouti | 2020-11-21 | 5660 | 61 | 5728·73 | 61·74 |
| Dominica | 2020-11-21 | 72 | ∙∙ | 1000·13 | ∙∙ |
| Dominican Republic | 2020-11-21 | 136784 | 2306 | 12609·26 | 212·58 |
| Ecuador | 2020-11-21 | 183840 | 13095 | 10419·96 | 742·22 |
| Egypt | 2020-11-21 | 112318 | 6521 | 1097·56 | 63·72 |
| El Salvador | 2020-11-21 | 37250 | 1070 | 5742·96 | 164·97 |
| Equatorial Guinea | 2020-11-21 | 5121 | 85 | 3650·08 | 60·59 |
| Eritrea | 2020-11-21 | 527 | ∙∙ | 148·60 | ∙∙ |
| Estonia | 2020-11-21 | 9076 | 87 | 6841·86 | 65·58 |
| Ethiopia | 2020-11-21 | 104879 | 1620 | 912·28 | 14·09 |
| Faeroe Islands | 2020-11-21 | 498 | ∙∙ | 10191·34 | ∙∙ |
| Falkland Islands | 2020-11-21 | 16 | ∙∙ | 4593·74 | ∙∙ |
| Fiji | 2020-11-21 | 35 | 2 | 39·04 | 2·23 |
| Finland | 2020-11-21 | 20747 | 375 | 3744·46 | 67·68 |
| France | 2020-11-21 | 2109170 | 48265 | 32312·80 | 739·43 |
| French Polynesia | 2020-11-21 | 12816 | 62 | 45624·13 | 220·72 |
| Gabon | 2020-11-21 | 9131 | 59 | 4102·48 | 26·51 |
| Gambia | 2020-11-21 | 3705 | 122 | 1533·11 | 50·48 |
| Georgia | 2020-11-21 | 100684 | 927 | 25239·30 | 232·38 |
| Germany | 2020-11-21 | 902528 | 13884 | 10772·09 | 165·71 |
| Ghana | 2020-11-21 | 50631 | 323 | 1629·42 | 10·40 |
| Gibraltar | 2020-11-21 | 943 | 3 | 27989·67 | 89·05 |
| Greece | 2020-11-21 | 87812 | 1419 | 8424·78 | 136·14 |
| Greenland | 2020-11-21 | 18 | ∙∙ | 317·06 | ∙∙ |
| Grenada | 2020-11-21 | 41 | ∙∙ | 364·38 | ∙∙ |
| Guam | 2020-11-21 | 6452 | 103 | 38226·60 | 610·25 |
| Guatemala | 2020-11-21 | 117757 | 4067 | 6572·89 | 227·01 |
| Guernsey | 2020-11-21 | 283 | 13 | 4220·61 | 193·88 |
| Guinea | 2020-11-21 | 12798 | 75 | 974·51 | 5·71 |
| Guinea-Bissau | 2020-11-21 | 2421 | 43 | 1230·18 | 21·85 |
| Guyana | 2020-11-21 | 5005 | 143 | 6363·16 | 181·81 |
| Haiti | 2020-11-21 | 9214 | 232 | 808·07 | 20·35 |
| Honduras | 2020-11-21 | 103488 | 2839 | 10448·47 | 286·63 |
| Hungary | 2020-11-21 | 170298 | 3689 | 17628·55 | 381·87 |
| Iceland | 2020-11-21 | 5251 | 26 | 15387·55 | 76·19 |
| India | 2020-11-21 | 9050597 | 132726 | 6558·38 | 96·18 |
| Indonesia | 2020-11-21 | 488310 | 15678 | 1785·26 | 57·32 |
| Iran | 2020-11-21 | 828377 | 43896 | 9862·46 | 522·62 |
| Iraq | 2020-11-21 | 531769 | 11883 | 13220·68 | 295·43 |
| Ireland | 2020-11-21 | 69802 | 2018 | 14136·27 | 408·68 |
| Isle of Man | 2020-11-21 | 368 | 25 | 4327·78 | 294·01 |
| Israel | 2020-11-21 | 327748 | 2744 | 37865·69 | 317·02 |
| Italy | 2020-11-21 | 1345767 | 48569 | 22258·13 | 803·30 |
| Jamaica | 2020-11-21 | 10151 | 235 | 3428·05 | 79·36 |
| Japan | 2020-11-21 | 127665 | 1963 | 1009·40 | 15·52 |
| Jersey | 2020-11-21 | 811 | 32 | 8023·90 | 316·60 |
| Jordan | 2020-11-21 | 174335 | 2116 | 17086·41 | 207·39 |
| Kazakhstan | 2020-11-21 | 168082 | 2370 | 8951·62 | 126·22 |
| Kenya | 2020-11-21 | 75193 | 1349 | 1398·39 | 25·09 |
| Kosovo | 2020-11-21 | 32877 | 885 | 17010·27 | 457·89 |
| Kuwait | 2020-11-21 | 139308 | 861 | 32620·52 | 201·61 |
| Kyrgyzstan | 2020-11-21 | 69149 | 1227 | 10598·86 | 188·07 |
| Laos | 2020-11-21 | 24 | ∙∙ | 3·30 | ∙∙ |
| Latvia | 2020-11-21 | 12102 | 146 | 6416·07 | 77·40 |
| Lebanon | 2020-11-21 | 113655 | 884 | 16651·67 | 129·52 |
| Lesotho | 2020-11-21 | 2066 | 44 | 964·41 | 20·54 |
| Liberia | 2020-11-21 | 1551 | 82 | 306·66 | 16·21 |
| Libya | 2020-11-21 | 76808 | 1068 | 11178·11 | 155·43 |
| Liechtenstein | 2020-11-21 | 1094 | 8 | 28686·05 | 209·77 |
| Lithuania | 2020-11-21 | 42757 | 357 | 15706·26 | 131·14 |
| Luxembourg | 2020-11-21 | 29243 | 254 | 46715·85 | 405·77 |
| Macedonia | 2020-11-21 | 52449 | 1462 | 25174·96 | 701·74 |
| Madagascar | 2020-11-21 | 17233 | 249 | 622·33 | 8·99 |
| Malawi | 2020-11-21 | 6003 | 185 | 313·80 | 9·67 |
| Malaysia | 2020-11-21 | 52638 | 329 | 1626·34 | 10·17 |
| Maldives | 2020-11-21 | 12546 | 45 | 23210·04 | 83·25 |
| Mali | 2020-11-21 | 4093 | 142 | 202·12 | 7·01 |
| Malta | 2020-11-21 | 8560 | 104 | 19386·74 | 235·54 |
| Marshall Islands | 2020-11-21 | 4 | ∙∙ | 67·57 | ∙∙ |
| Mauritania | 2020-11-21 | 8034 | 168 | 1727·87 | 36·13 |
| Mauritius | 2020-11-21 | 494 | 10 | 388·44 | 7·86 |
| Mexico | 2020-11-21 | 1025969 | 100823 | 7957·40 | 781·98 |
| Moldova | 2020-11-21 | 95383 | 2111 | 23644·99 | 523·31 |
| Monaco | 2020-11-21 | 577 | 2 | 14702·89 | 50·96 |
| Mongolia | 2020-11-21 | 578 | ∙∙ | 176·31 | ∙∙ |
| Montenegro | 2020-11-21 | 30079 | 429 | 47891·77 | 683·05 |
| Montserrat | 2020-11-21 | 13 | 1 | 2600·52 | 200·04 |
| Morocco | 2020-11-21 | 316260 | 5182 | 8568·28 | 140·39 |
| Mozambique | 2020-11-21 | 14877 | 121 | 475·98 | 3·87 |
| Myanmar | 2020-11-21 | 76414 | 1695 | 1404·42 | 31·15 |
| Namibia | 2020-11-21 | 13712 | 143 | 5396·48 | 56·28 |
| Nepal | 2020-11-21 | 216965 | 1298 | 7446·42 | 44·55 |
| Netherlands | 2020-11-21 | 472616 | 8810 | 27582·11 | 514·16 |
| New Caledonia | 2020-11-21 | 32 | ∙∙ | 112·09 | ∙∙ |
| New Zealand | 2020-11-21 | 1663 | 25 | 344·86 | 5·18 |
| Nicaragua | 2020-11-21 | 5661 | 159 | 854·55 | 24·00 |
| Niger | 2020-11-21 | 1340 | 70 | 55·36 | 2·89 |
| Nigeria | 2020-11-21 | 65982 | 1165 | 320·08 | 5·65 |
| Northern Mariana Islands | 2020-11-21 | 103 | 2 | 1789·53 | 34·75 |
| Norway | 2020-11-21 | 31438 | 306 | 5799·04 | 56·45 |
| Oman | 2020-11-21 | 121360 | 1365 | 23765·22 | 267·30 |
| Pakistan | 2020-11-21 | 371508 | 7603 | 1681·85 | 34·42 |
| Palestine | 2020-11-21 | 81294 | 684 | 15935·58 | 134·08 |
| Panama | 2020-11-21 | 152289 | 2932 | 35294·83 | 679·53 |
| Papua New Guinea | 2020-11-21 | 604 | 7 | 67·51 | 0·78 |
| Paraguay | 2020-11-21 | 75058 | 1647 | 10523·34 | 230·91 |
| Peru | 2020-11-21 | 946087 | 35484 | 28693·78 | 1076·19 |
| Philippines | 2020-11-21 | 415067 | 8025 | 3787·76 | 73·23 |
| Poland | 2020-11-21 | 819262 | 12714 | 21646·91 | 335·94 |
| Portugal | 2020-11-21 | 249498 | 3762 | 24468·49 | 368·94 |
| Puerto Rico | 2020-11-21 | 81846 | 991 | 28609·08 | 346·40 |
| Qatar | 2020-11-21 | 136888 | 235 | 47513·07 | 81·57 |
| Romania | 2020-11-21 | 403123 | 9756 | 20954·86 | 507·13 |
| Russia | 2020-11-21 | 2064748 | 35778 | 14148·46 | 245·17 |
| Rwanda | 2020-11-21 | 5586 | 46 | 431·28 | 3·55 |
| Saint Kitts and Nevis | 2020-11-21 | 19 | ∙∙ | 357·20 | ∙∙ |
| Saint Lucia | 2020-11-21 | 203 | 2 | 1105·49 | 10·89 |
| Saint Vincent and the Grenadines | 2020-11-21 | 84 | ∙∙ | 757·12 | ∙∙ |
| San Marino | 2020-11-21 | 1395 | 43 | 41104·37 | 1267·02 |
| Sao Tome and Principe | 2020-11-21 | 974 | 17 | 4444·22 | 77·57 |
| Saudi Arabia | 2020-11-21 | 354813 | 5745 | 10191·72 | 165·02 |
| Senegal | 2020-11-21 | 15848 | 330 | 946·49 | 19·71 |
| Serbia | 2020-11-21 | 110351 | 1140 | 16217·13 | 167·53 |
| Seychelles | 2020-11-21 | 163 | ∙∙ | 1657·52 | ∙∙ |
| Sierra Leone | 2020-11-21 | 2399 | 74 | 300·74 | 9·28 |
| Singapore | 2020-11-21 | 58143 | 28 | 9938·39 | 4·79 |
| Sint Maarten (Dutch part) | 2020-11-21 | 983 | 25 | 22923·37 | 583·00 |
| Slovakia | 2020-11-21 | 93396 | 614 | 17106·61 | 112·46 |
| Slovenia | 2020-11-21 | 62580 | 644 | 30102·00 | 309·77 |
| Solomon Islands | 2020-11-21 | 16 | ∙∙ | 23·29 | ∙∙ |
| Somalia | 2020-11-21 | 4382 | 108 | 275·72 | 6·80 |
| South Africa | 2020-11-21 | 762763 | 20759 | 12860·90 | 350·02 |
| South Korea | 2020-11-21 | 30403 | 503 | 593·01 | 9·81 |
| South Sudan | 2020-11-21 | 3016 | 59 | 269·44 | 5·27 |
| Sri Lanka | 2020-11-21 | 19280 | 74 | 900·38 | 3·46 |
| Sudan | 2020-11-21 | 15530 | 1185 | 354·17 | 27·02 |
| Suriname | 2020-11-21 | 5289 | 116 | 9015·84 | 197·74 |
| Swaziland | 2020-11-21 | 6185 | 119 | 5331·14 | 102·57 |
| Sweden | 2020-11-21 | 208295 | 6406 | 20624·76 | 634·30 |
| Switzerland | 2020-11-21 | 289483 | 3567 | 33448·39 | 412·15 |
| Syria | 2020-11-21 | 7079 | 368 | 404·50 | 21·03 |
| Taiwan | 2020-11-21 | 611 | 7 | 25·65 | 0·29 |
| Tajikistan | 2020-11-21 | 11815 | 86 | 1238·78 | 9·02 |
| Tanzania | 2020-11-21 | 509 | 21 | 8·52 | 0·35 |
| Thailand | 2020-11-21 | 3902 | 60 | 55·90 | 0·86 |
| Timor | 2020-11-21 | 30 | ∙∙ | 22·75 | ∙∙ |
| Togo | 2020-11-21 | 2796 | 64 | 337·73 | 7·73 |
| Trinidad and Tobago | 2020-11-21 | 6261 | 113 | 4473·77 | 80·74 |
| Tunisia | 2020-11-21 | 86265 | 2684 | 7299·08 | 227·10 |
| Turkey | 2020-11-21 | 435273 | 12084 | 5160·99 | 143·28 |
| Turks and Caicos Islands | 2020-11-21 | 740 | 6 | 19112·56 | 154·97 |
| Uganda | 2020-11-21 | 17431 | 168 | 381·08 | 3·67 |
| Ukraine | 2020-11-21 | 612665 | 10813 | 14008·97 | 247·25 |
| United Arab Emirates | 2020-11-21 | 156523 | 547 | 15825·75 | 55·31 |
| United Kingdom | 2020-11-21 | 1473508 | 54286 | 21705·62 | 799·66 |
| United States | 2020-11-21 | 11913944 | 254413 | 35993·50 | 768·61 |
| United States Virgin Islands | 2020-11-21 | 1482 | 23 | 14192·28 | 220·26 |
| Uruguay | 2020-11-21 | 4477 | 69 | 1288·82 | 19·86 |
| Uzbekistan | 2020-11-21 | 71280 | 603 | 2129·72 | 18·02 |
| Vanuatu | 2020-11-21 | 1 | ∙∙ | 3·26 | ∙∙ |
| Vatican | 2020-11-21 | 26 | ∙∙ | 32138·44 | ∙∙ |
| Venezuela | 2020-11-21 | 98665 | 863 | 3469·73 | 30·35 |
| Vietnam | 2020-11-21 | 1305 | 35 | 13·41 | 0·36 |
| Wallis and Futuna | 2020-11-21 | 2 | ∙∙ | 177·84 | ∙∙ |
| Western Sahara | 2020-11-21 | 766 | 1 | 1282·37 | 1·67 |
| Yemen | 2020-11-21 | 2090 | 607 | 70·07 | 20·35 |
| Zambia | 2020-11-21 | 17373 | 356 | 945·01 | 19·37 |
| Zimbabwe | 2020-11-21 | 9120 | 265 | 613·61 | 17·83 |
| World | 2020-11-21 | 57705979 | 1373695 | 7403·14 | 176·23 |
| International | 2020-11-21 | 696 | 7 | ∙∙ | ∙∙ |

Database: Our World in Data
